# Supplementary material for: Associations between job demands, job resources and patient-related burnout among physicians: results from a multicentre observational study
Source: PubMed Central journal article supplement (PMC7517563; doi:10.1136/bmjopen-2020-038466), 2020-09-24
Supplement: bmjopen-2020-038466supp001.pdf [file bmjopen-2020-038466supp001.pdf]

## Supplementary tables

**Table A1.** The job resources, job demands and patient-related burnout items and corresponding psychometric properties

| Construct (Cronbach's $\alpha$ ) | Subscale (Cronbach's $\alpha$ )                      | Mean (SD)*  | Item code (corrected item-total correlation) | Factor loadings | Item                                                                           |
|----------------------------------|------------------------------------------------------|-------------|----------------------------------------------|-----------------|--------------------------------------------------------------------------------|
| Job resources                    | Relationships with colleagues ( $\alpha = 0.75$ )    | 3.43 (0.47) | (0.34)                                       | 0.35            | Asking colleagues for support                                                  |
|                                  |                                                      |             | (0.62)                                       | 0.71            | Good understanding with colleagues                                             |
|                                  |                                                      |             | (0.54)                                       | 0.60            | Conflicts with colleagues                                                      |
|                                  |                                                      |             | (0.65)                                       | 0.77            | Pleasant atmosphere between colleagues                                         |
|                                  |                                                      |             | (0.48)                                       | 0.56            | Unpleasant events with colleagues                                              |
|                                  | Participation in decision-making ( $\alpha = 0.82$ ) | 3.60 (0.74) | (0.63)                                       | 0.63            | Participation in important decisions                                           |
|                                  |                                                      |             | (0.73)                                       | 0.85            | Participation in assignment of tasks                                           |
|                                  |                                                      |             | (0.60)                                       | 0.68            | Participation in timetable planning                                            |
|                                  |                                                      |             | (0.61)                                       | 0.63            | Influence on work                                                              |
|                                  | Development opportunities ( $\alpha = 0.84$ )        | 4.14 (0.69) | (0.68)                                       | -0.82           | Opportunity to learn new things in work                                        |
|                                  |                                                      |             | (0.75)                                       | -0.77           | Opportunity to grow and develop                                                |
|                                  |                                                      |             | (0.68)                                       | -0.72           | Opportunity to achieve something in work                                       |
|                                  | Leaders' inspiration ( $\alpha = 0.91$ )             | 2.64 (0.82) | (0.83)                                       | 0.87            | Enthusiasm of the leader                                                       |
|                                  |                                                      |             | (0.78)                                       | 0.83            | Good example of the leader                                                     |
|                                  |                                                      |             | (0.82)                                       | 0.85            | Ratification of the leader                                                     |
|                                  |                                                      |             | (0.79)                                       | 0.81            | Clear vision of the leader                                                     |
|                                  | Relationships with patients ( $\alpha = 0.71$ )      | 3.81 (0.62) | (0.33)                                       | 0.29            | I find my present clinical work personally rewarding                           |
|                                  |                                                      |             | (0.61)                                       | 0.72            | I feel a strong personal connection with my patients                           |
|                                  |                                                      |             | (0.57)                                       | 0.74            | The gratitude displayed by my patients keeps me going                          |
|                                  |                                                      |             | (0.51)                                       | 0.64            | I am having a positive impact on a socio-economically disadvantaged population |
| Job demands                      | Bureaucratic load ( $\alpha = 0.74$ )                | 3.11 (0.73) | (0.52)                                       | 0.60            | Not burdensome to burdensome policies and procedures                           |

|                         |                                             |             |        |      |                                                                                      |
|-------------------------|---------------------------------------------|-------------|--------|------|--------------------------------------------------------------------------------------|
|                         |                                             |             | (0.58) | 0.72 | Necessary to unnecessary policies and procedures                                     |
|                         |                                             |             | (0.62) | 0.80 | Effective to ineffective policies and procedures                                     |
|                         | Workload ( $\alpha = 0.79$ )                | 2.85 (0.52) | (0.39) | 0.47 | Amount of work                                                                       |
|                         |                                             |             | (0.58) | 0.69 | Extra work to complete tasks                                                         |
|                         |                                             |             | (0.61) | 0.70 | Hurry in work                                                                        |
|                         |                                             |             | (0.56) | 0.64 | Arrear in work                                                                       |
|                         |                                             |             | (0.54) | 0.59 | Problems with work pace                                                              |
|                         |                                             |             | (0.60) | 0.65 | Problems with workload                                                               |
| Patient-related burnout | Patient-related burnout ( $\alpha = 0.83$ ) | 1.91 (0.63) | (0.65) | 0.81 | Do you find it hard to work with patients?                                           |
|                         |                                             |             | (0.67) | 0.69 | Do you find it frustrating to work with patients?                                    |
|                         |                                             |             | (0.72) | 0.56 | Does it drain your energy to work with patients?                                     |
|                         |                                             |             | (0.61) | 0.50 | Do you feel that you give more than you get back when you work with patients?        |
|                         |                                             |             | (0.54) | 0.74 | Are you tired of working with patients?                                              |
|                         |                                             |             | (0.46) | 0.75 | Do you sometimes wonder how long you will be able to continue working with patients? |

\*SD = standard deviation

**Table A2.** Inter-scale correlations for the subscales of the job resources and job demands constructs

|                                  | Job resources                 |                                  |                           |                           |                             | Job demands       |          |
|----------------------------------|-------------------------------|----------------------------------|---------------------------|---------------------------|-----------------------------|-------------------|----------|
|                                  | Relationships with colleagues | Participation in decision-making | Development possibilities | Inspiration by the leader | Relationships with patients | Bureaucratic load | Workload |
| Relationships with colleagues    | 1                             | 0.32**                           | 0.30**                    | 0.34**                    | 0.15**                      | -                 | -        |
| Participation in decision making | -                             | 1                                | 0.40**                    | 0.38**                    | 0.17**                      | -                 | -        |
| Development opportunities        | -                             | -                                | 1                         | 0.34**                    | 0.28**                      | -                 | -        |
| Leaders' inspiration             | -                             | -                                | -                         | 1                         | 0.10*                       | -                 | -        |
| Relationships with patients      | -                             | -                                | -                         | -                         | 1                           | -                 | -        |
| Bureaucratic load                | -                             | -                                | -                         | -                         | -                           | 1                 | 0.15**   |
| Workload                         | -                             | -                                | -                         | -                         | -                           | -                 | 1        |

\*significant Pearson correlation  $p < 0.01$ \*\* significant Pearson correlation  $p < 0.05$
